# Supplementary material
Source: Research Square preprint supplement (doi:10.21203/rs.3.rs-9579147/v1)
Supplement: Supplementary file 1 [file d4d9bd8a2b02382890cfff53.docx]

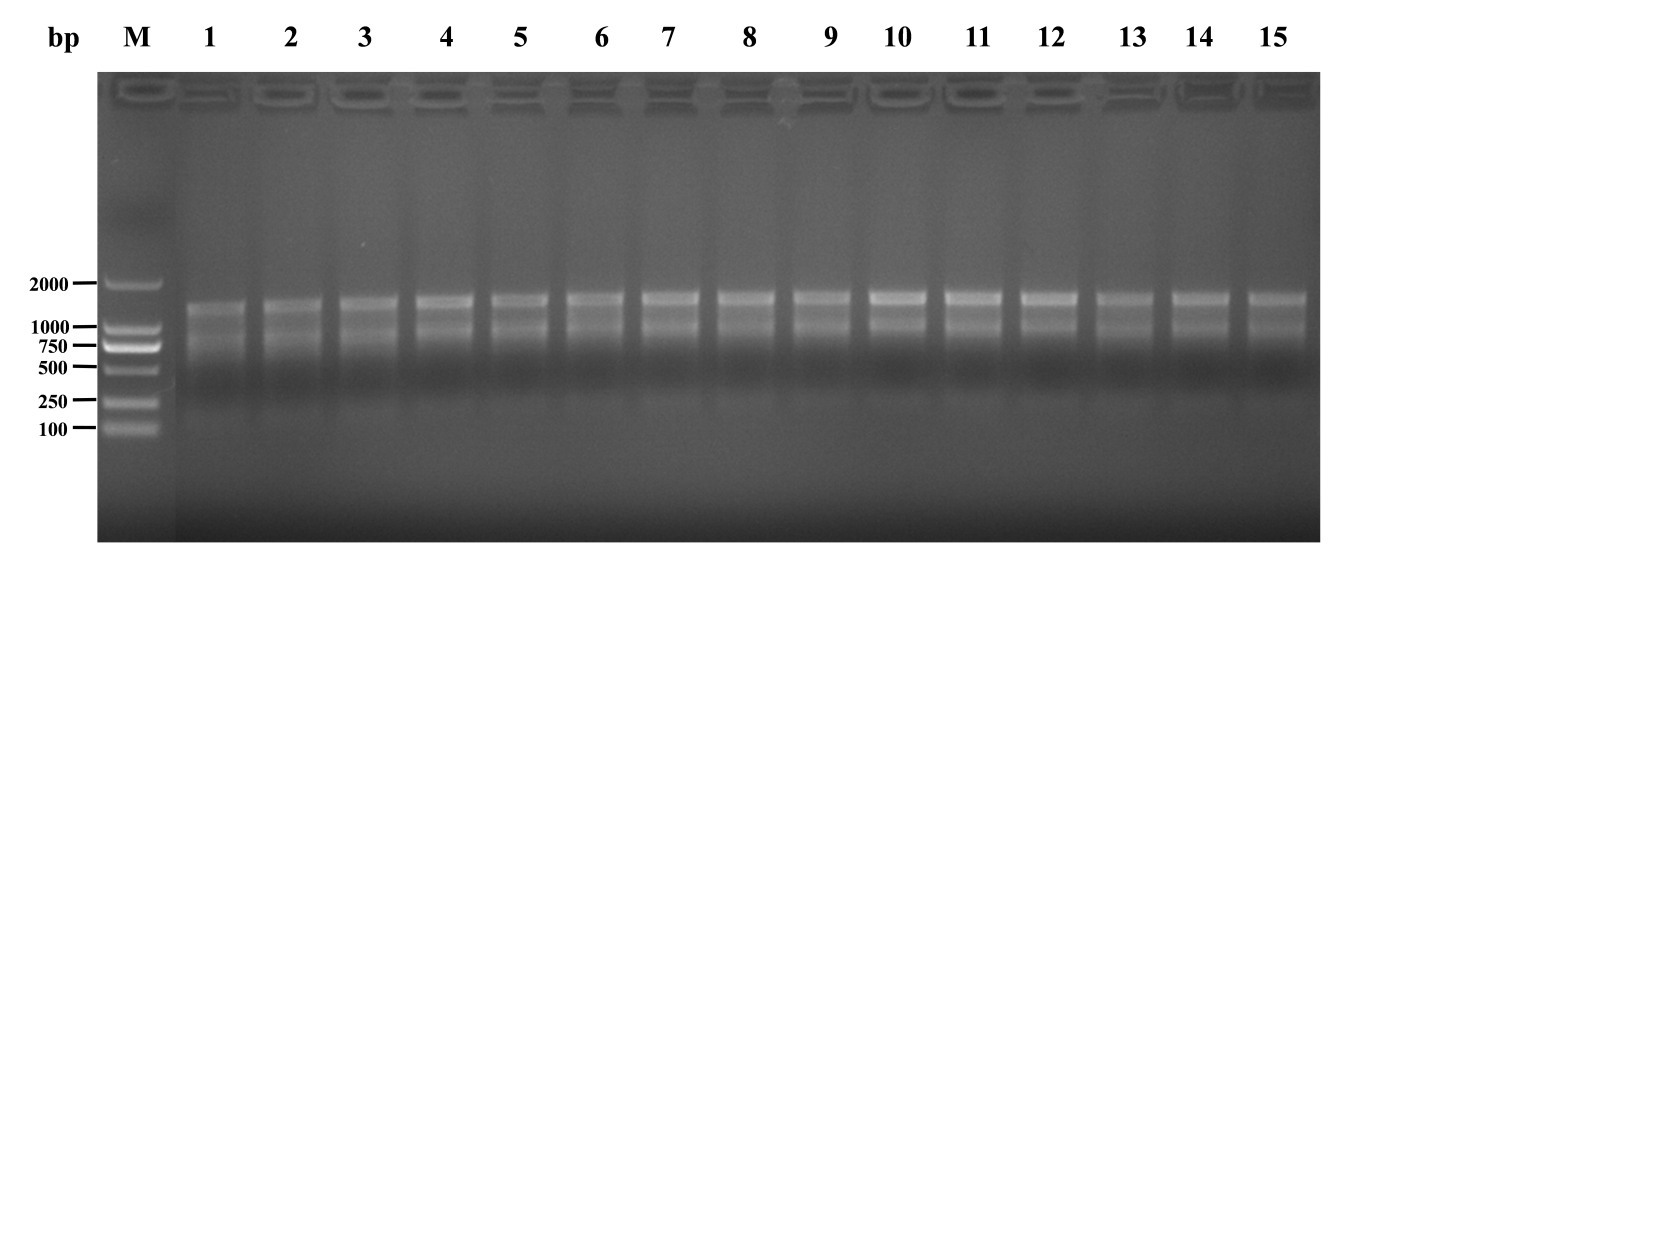
**Fig. S1 RNA quality test results of tomato leaf tissue**

M : Marker ; 1-3 : RNA of tomato leaf tissue in CK control group, 4-6 : RNA of tomato leaf tissue in EA control group, 7-9 : RNA of tomato leaf tissue in NKZ-259 treatment group, 10-12 : RNA of tomato leaf tissue in MeDHPQCA treatment group. 13-15 : RNA of tomato leaf tissue in DHPQCA treatment group

**Fig. S2 RNA quality test results of cucumber leaf tissue**

M : Marker ; 1-3 : RNA of cucumber leaf tissue in CK control group, 4-6 : RNA of cucumber leaf tissue in EA control group, 7-9 : RNA of cucumber leaf tissue in NAA control group, 10-12 : RNA of cucumber leaf tissue in NKZ-259 treatment group. 13-15 : RNA of cucumber leaf tissue in DHPQCA treatment group

**
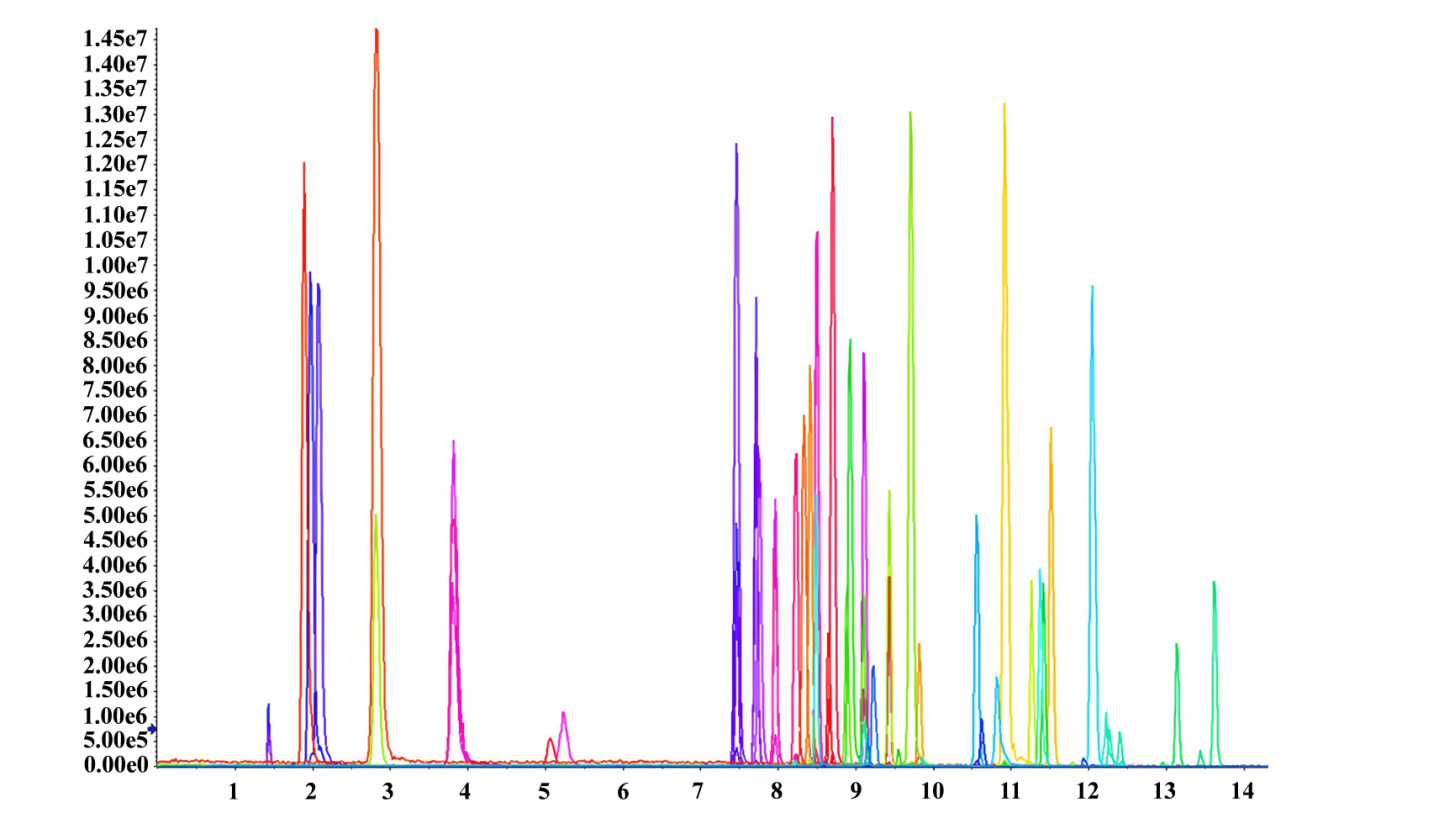
Fig. S3 XIC Chromatogram of Standard Mixture**

**
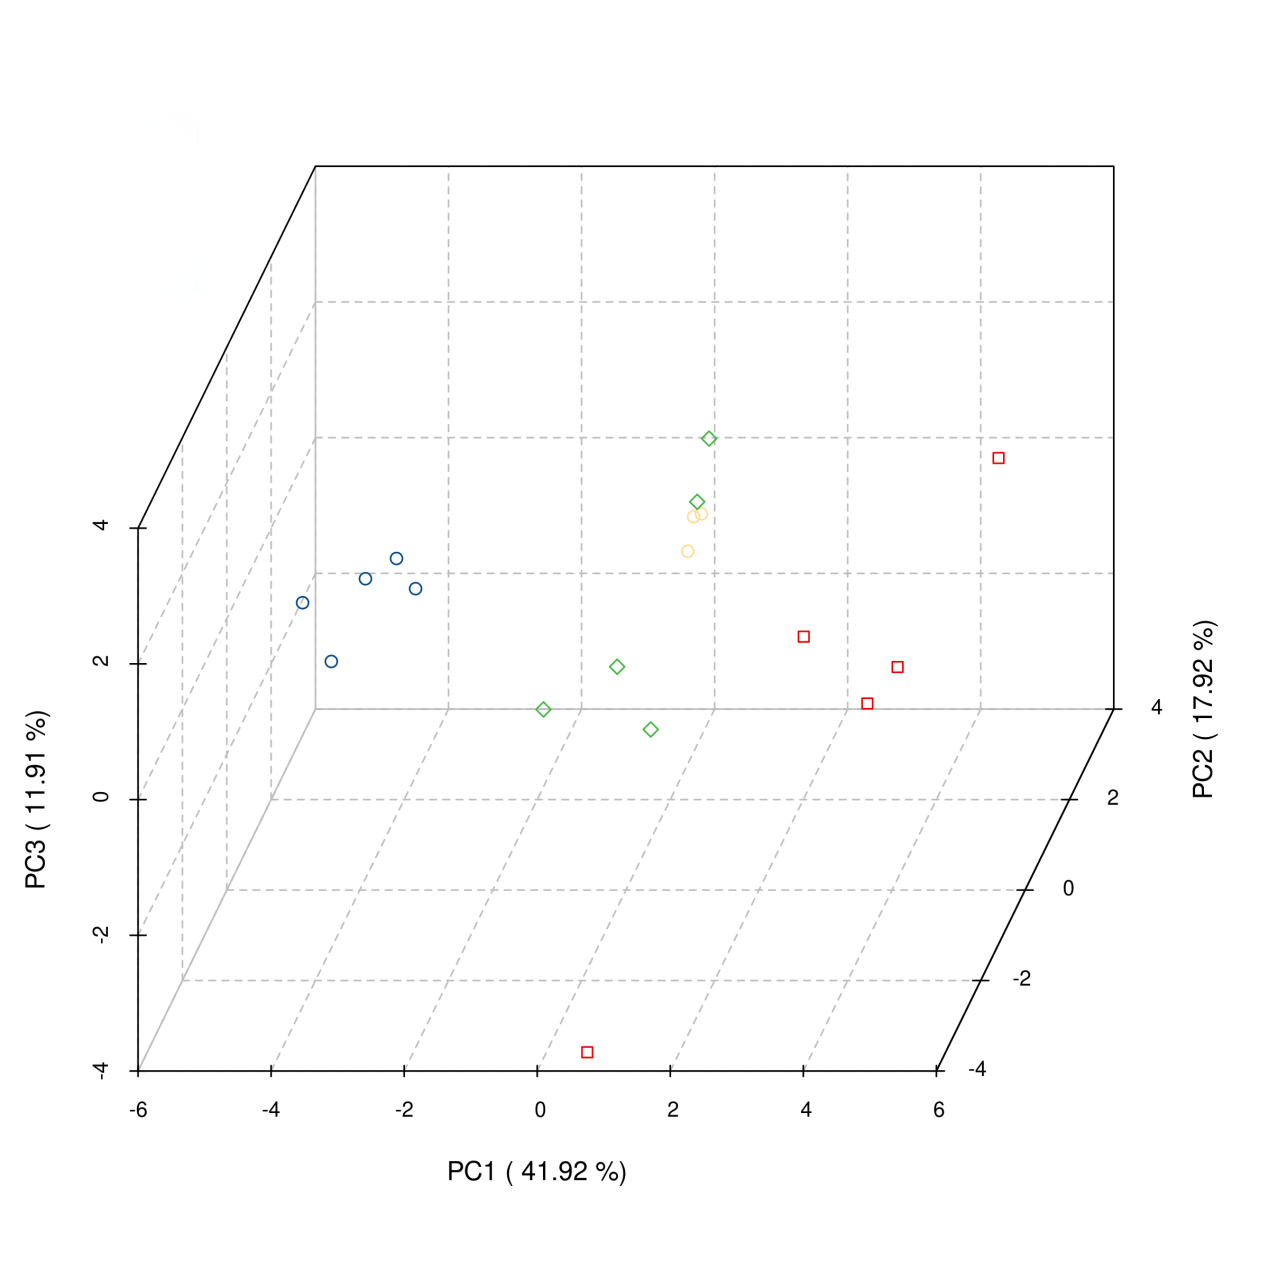
Fig. S4 PCA of differential hormones in tomato**

Blue: Solvent control (0.1% v/v anhydrous ethanol); Red: DHPQCA treatment group; Green: MeDHPQCA treatment group; Yellow: Sample mixture for quality control.

**
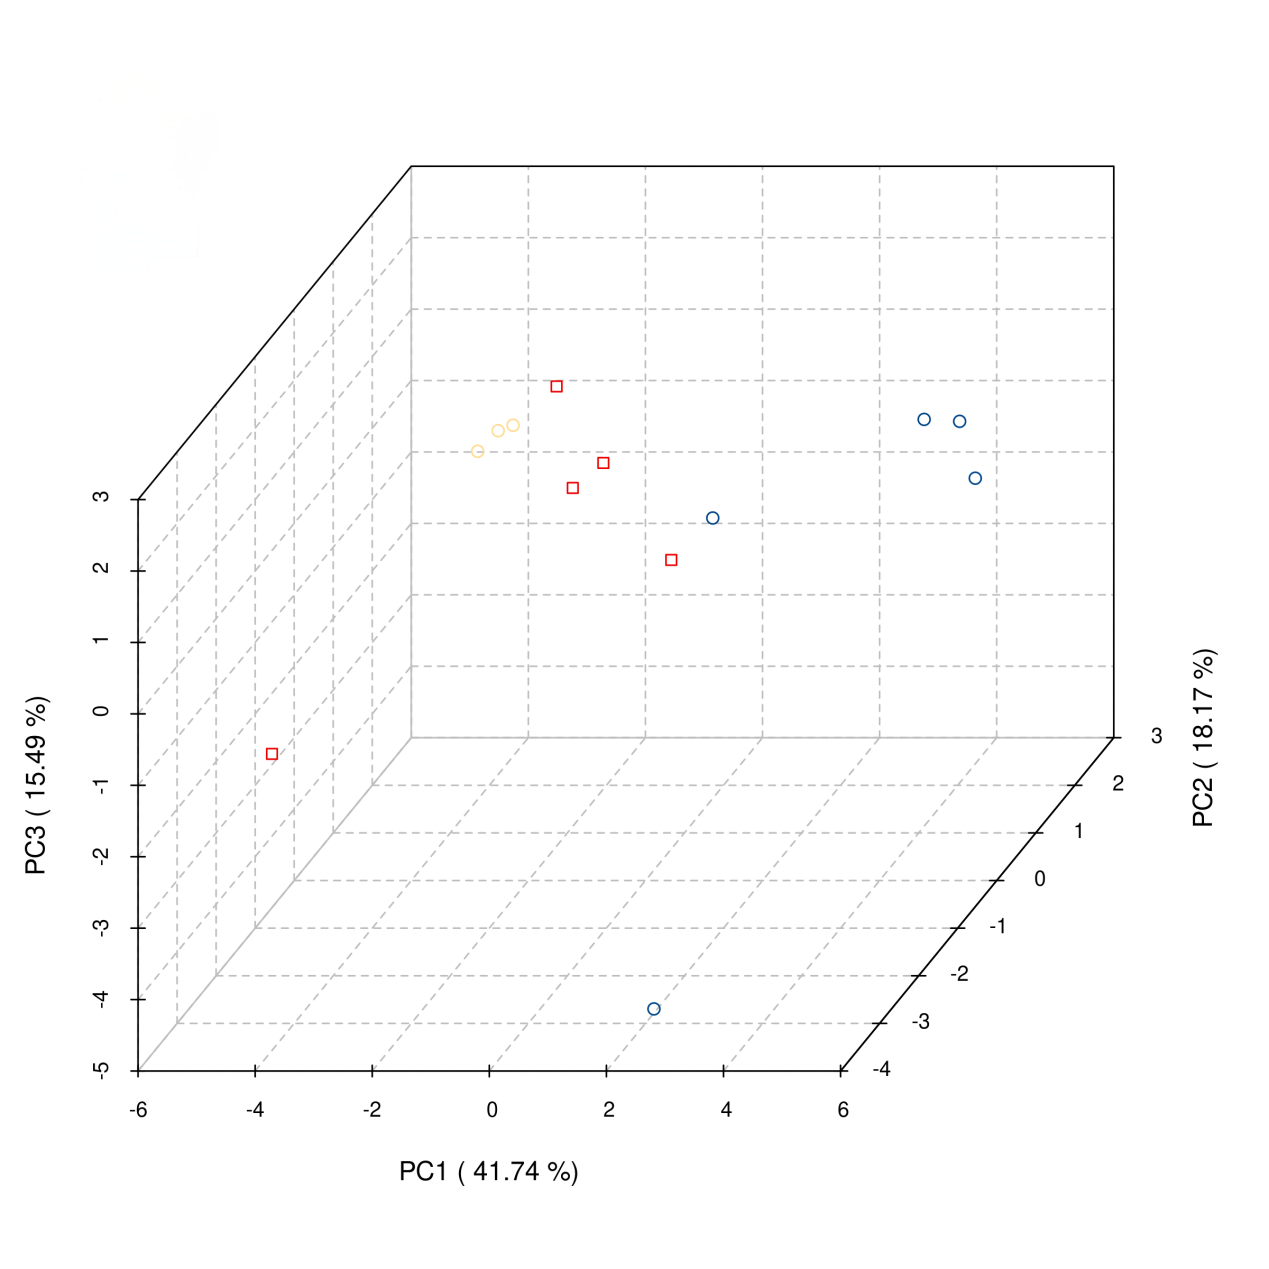
Fig. S5 PCA of differential hormones in cucumber**

Blue: Solvent control (0.1% v/v anhydrous ethanol); Red: DHPQCA treatment group; Yellow: Sample mixture for quality control.

**
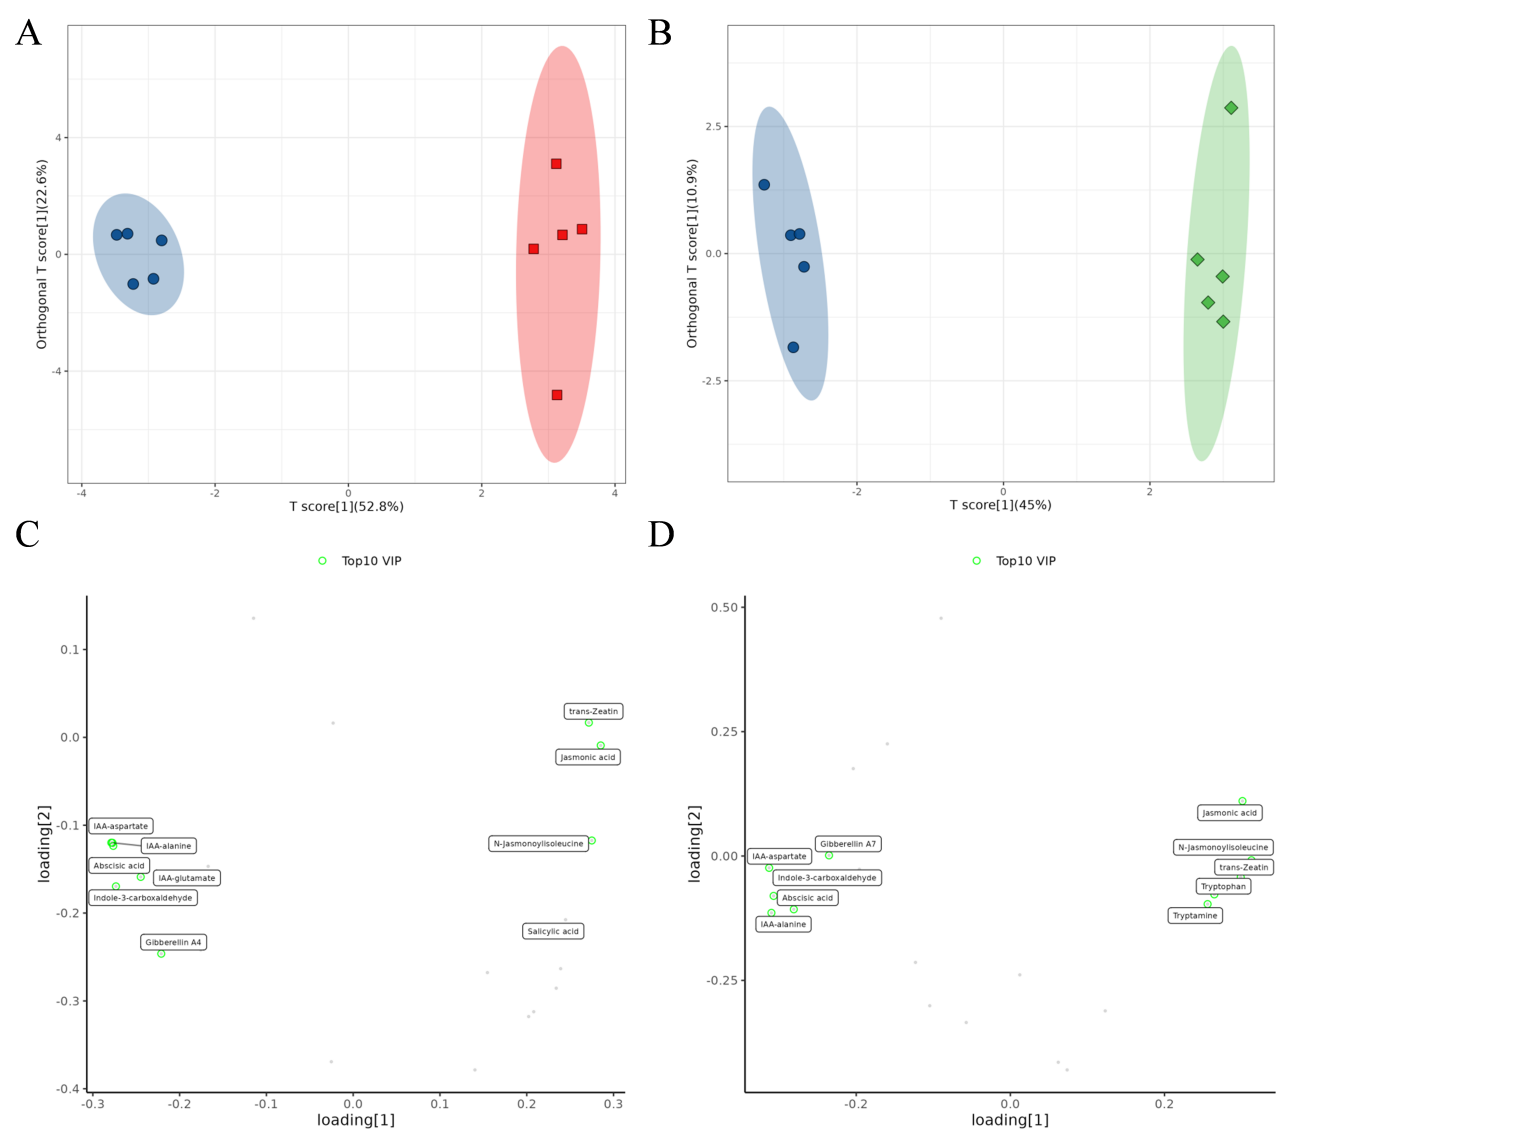
**

**Fig. S6 OPLS-DA Analysis of Treatment Groups in Tomato. Score plot for the DHPQCA vs Solvent control comparison (A) and MeDHPQCA vs Solvent control comparison (B); loading plot for the DHPQCA vs Solvent control comparison (C) and MeDHPQCA vs Solvent control comparison (D).**

Blue: Solvent control (0.1% v/v anhydrous ethanol); Red: DHPQCA treatment group; Green: MeDHPQCA treatment group; Yellow: Sample mixture for quality control.

**Fig. S
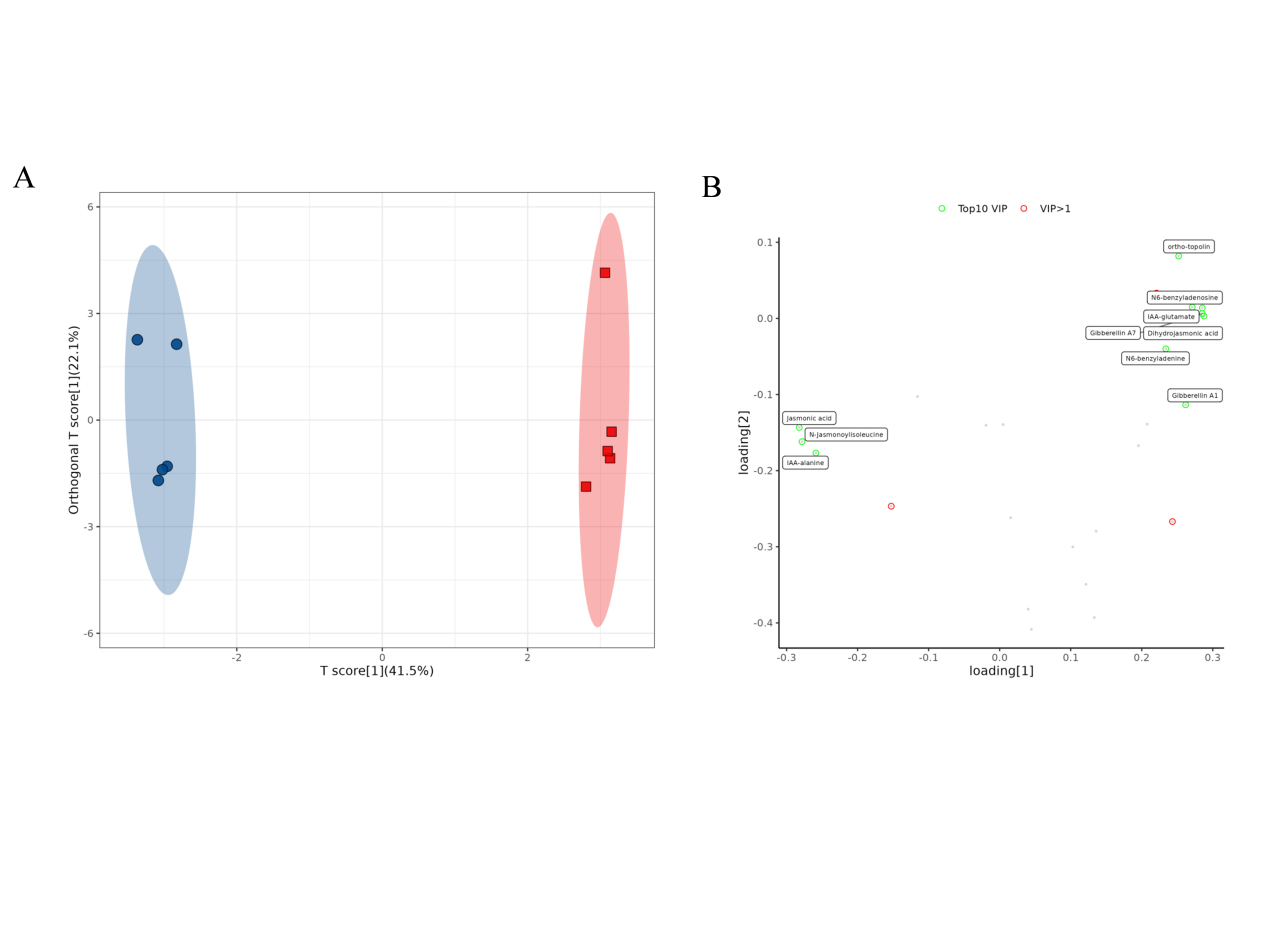
7 OPLS-DA score plot of the comparison groups in the cucumber (A) and OPLS-DA loading plot of the comparison groups in the cucumber (B).**

Blue: Solvent control (0.1% v/v anhydrous ethanol); Red: DHPQCA treatment group; Yellow: Sample mixture for quality control.

**
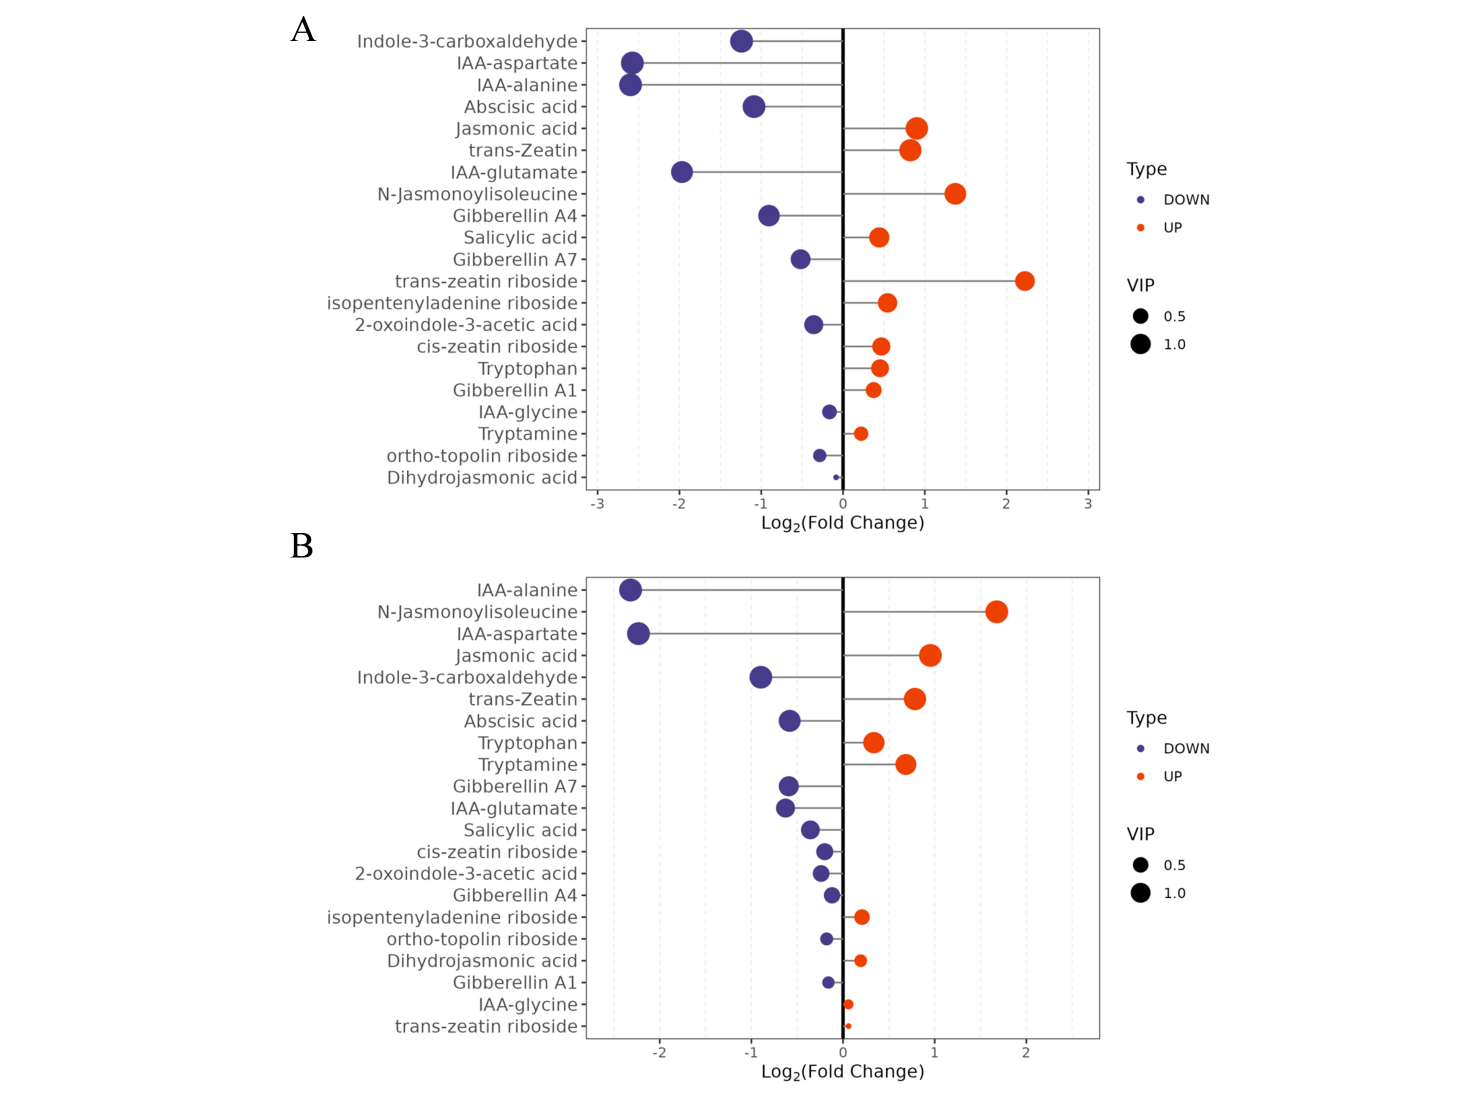
**

**Fig. S8 Changes in relative composition of tomato endogenous hormones for the DHPQCA vs Solvent control comparison (A) and MeDHPQCA vs Solvent control comparison (B).** The horizontal axis represents log₂ (Fold Change); the vertical axis lists hormone names. Data points in blue (left side) and red (right side) indicate decreased and increased hormone levels, respectively.

**
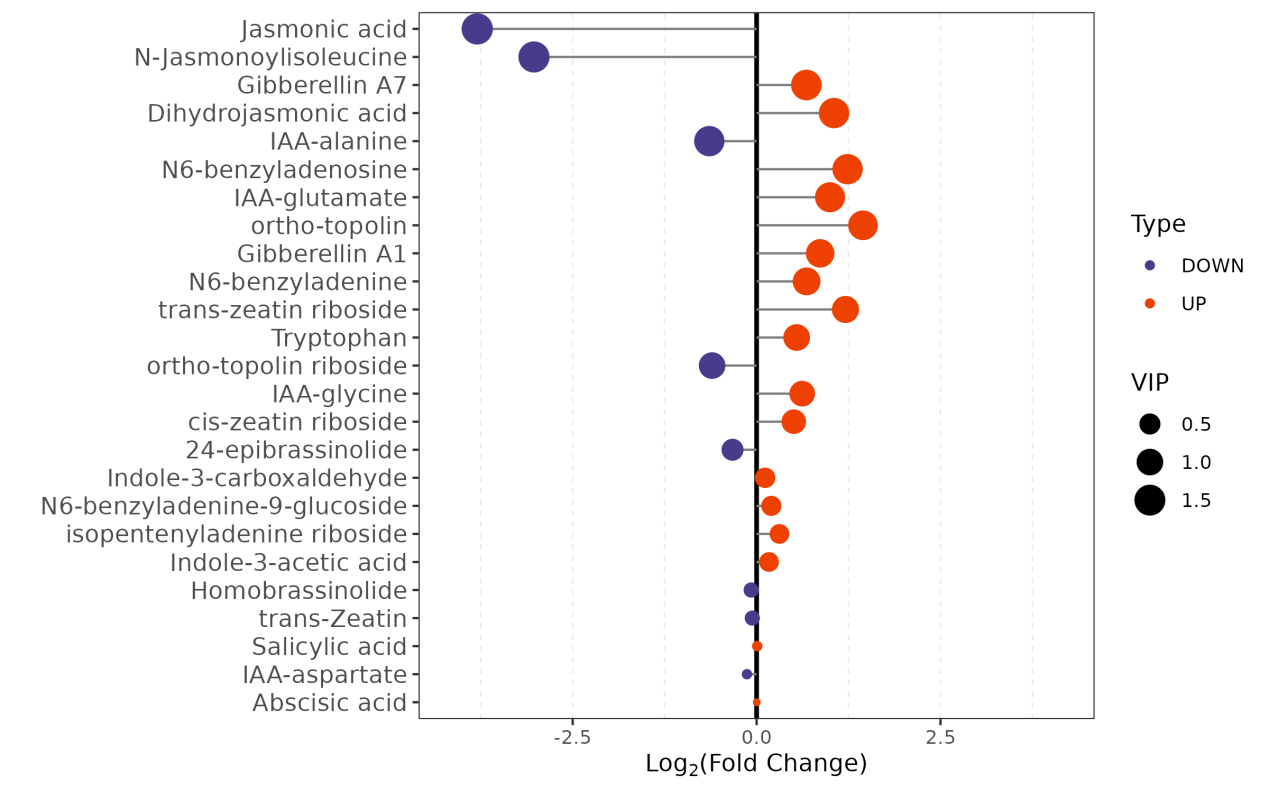
**

**Fig. S9 Changes in relative composition of cucumber endogenous hormones under DHPQCA.** The horizontal axis represents log₂ (Fold Change); the vertical axis lists hormone names. Data points in blue (left side) and red (right side) indicate decreased and increased hormone levels, respectively.

Table S1. CAS of 47 plant hormones.

| Name | Abbreviation | CAS |  |
| --- | --- | --- | --- |
| *trans*-Zeatin | *t*Z | 1637-39-4 |  |
| *trans*-Zeatin riboside | *t*ZR | 6025-53-2 |  |
| Dihydrozeatin | DHZ | 23599-75-9 |  |
| Dihydrozeatin riboside | DHZR | 22663-55-4 |  |
| *cis*-zeatin riboside | *c*ZR | 15896-46-5 |  |
| N6-isopentenyladenine | IP | 2365-40-4 |  |
| isopentenyladenine riboside | IPR | 7724-76-7 |  |
| *para*-topolin | *p*T | 80054-30-4 |  |
| *para*-topolin riboside | *p*TR | 23666-24-2 |  |
| *meta*-topolin | *m*T | 75737-38-1 |  |
| *meta* topolin riboside | *m*TR | 110505-76-5 |  |
| ortho-topolin | oT | 20366-83-0 |  |
| ortho-topolin riboside | oTR | 50868-58-1 |  |
| N6-benzyladenine | BAP | 1214-39-7 |  |
| N6-benzyladenosine | BAPR | 4294-16-0 |  |
| N6-benzyladenine-9-glucoside | BAP9G | 4294-17-1 |  |
| Kinetin | K | 525-79-1 |  |
| Kinetin riboside | KR | 4338-47-0 |  |
| Tryptamine | TRA | 61-54-1 |  |
| Tryptophan | TRP | 73-22-3 |  |
| Indol-3-acetamide | IAM | 879-37-8 |  |
| 2-oxoindole-3-acetic acid | OxIAA | 2971-31-5 |  |
| Indole-3-acetic acid | IAA | 87-51-4 |  |
| Methyl indole-3-acetate | MeIAA | 1912-33-0 |  |
| Indole-3-acetonitrile | IAN | 771-51-7 |  |
| 3-Indolebutyric acid | IBA | 133-32-4 |  |
| Indole-3-carboxaldehyde | ICA | 487-89-8 |  |
| Melatonin | MT | 73-31-4 |  |
| IAA-glycine | IAA-Gly | 13113-08-1 |  |
| IAA-glutamate | IAA-Glu | 57105-48-3 |  |
| IAA-alanine | IAA-Ala | 57105-39-2 |  |
| IAA-leucine | IAA-Leu | 36838-63-8 |  |
| IAA-aspartate | IAA-Asp | 2456-73-7 |  |
| Jasmonic acid | JA | 6894-38-8 |  |
| N-Jasmonoylisoleucine | JA-ILE | 120330-93-0 |  |
| Dihydrojasmonic acid | 9,10-dh-JA | 98674-52-3 |  |
| Salicylic acid | SA | 69-72-7 |  |
| Methyl salicylate | MESA | 119-36-8 |  |
| Abscisic acid | ABA | 14375-45-2 |  |
| Gibberellin A3 | GA3 | 1977/6/5 |  |
| Gibberellin A1 | GA1 | 545-97-1 |  |
| Gibberellin A7 | GA7 | 510-75-8 |  |
| Gibberellin A5 | GA5 | 561-56-8 |  |
| Gibberellin A4 | GA4 | 468-44-0 |  |
| Brassinolide | BL(BR) | 72962-43-7 |  |
| 24-*epi*brassinolide | *epi*BL | 78821-43-9 |  |
| Homobrassinolide | homoBL | 74174-44-0 |  |

Table S2. Metabolite Ion Peak Table

| Name | Ionization mode | Ion pair | Retention time (min) |
| --- | --- | --- | --- |
| OxIAA | Positive | 192.2/146.1 | 8.95 |
| IBA | Positive | 204/186 | 11.15 |
| ABA | Negative | 263.2/153.1 | 10.95 |
| *c*ZR | Positive | 352.2/220.105 | 8.18 |
| GA1 | Negative | 347.102/259.101 | 9.62 |
| GA7 | Negative | 329/211 | 11.84 |
| IAA-Ala | Positive | 247.2/130.106 | 9.88 |
| IAA-Asp | Positive | 291.2/130.1 | 9.51 |
| IAA-Glu | Positive | 305.2/130.105 | 8.94 |
| ICA | Positive | 146/118 | 10.01 |
| IPR | Positive | 336.3/204.101 | 9.65 |
| JA | Negative | 209.2/58.8 | 11.27 |
| KR | Positive | 348.2/216.101 | 9.16 |
| MT | Positive | 233/174 | 10.2 |
| *m*TR | Positive | 374.2/242.103 | 8.95 |
| MeIAA | Positive | 190.086/130.065 | 12.07 |
| MESA | Positive | 153/121 | 12.87 |
| IP | Positive | 204.201/136.003 | 9.05 |
| JA-ILE | Positive | 324.3/151.2 | 12.16 |
| SA | Negative | 137/92.8 | 10.55 |
| *t*Z | Positive | 220.2/136.2 | 5.84 |
| *t*ZR | Positive | 352.3/220.101 | 8.02 |
| TRA | Positive | 161.1/144.1 | 7.67 |
| TRP | Positive | 205.097/188.07 | 6.3 |

| Plant | Sample name | Raw Reads | Clean Reads | Clean Bases | Error  Rate (%) | Q20  (%) | Q30  (%) | GC  Content (%) |
| --- | --- | --- | --- | --- | --- | --- | --- | --- |
| Tomato | T_CK_1 | 77126244 | 75617298 | 11.1G | 0.01% | 98.94 | 96.65 | 42.59 |
| T_CK_2 | 67286554 | 66423002 | 9.57G | 0.01% | 98.97 | 96.78 | 40.51 |
| T_CK_3 | 78598048 | 77566352 | 11.11G | 0.01% | 99.01 | 96.93 | 40.69 |
| T_EA_1 | 61243628 | 60595806 | 8.87G | 0.01% | 99 | 96.83 | 41.57 |
| T_EA_2 | 53610786 | 52936308 | 7.69G | 0.01% | 99 | 96.86 | 42.3 |
| T_EA_3 | 62002772 | 61285514 | 8.95G | 0.01% | 98.93 | 96.64 | 40.16 |
| T_CK_N_1 | 66759740 | 65838070 | 9.8G | 0.01% | 99.22 | 97.52 | 42.51 |
| T_CK_N_2 | 59243248 | 58782212 | 8.72G | 0.01% | 99.22 | 97.42 | 42.45 |
| T_CK_N_3 | 43537192 | 43199442 | 6.43G | 0.01% | 99.11 | 97.07 | 42.4 |
| T_NKZ_259_1 | 57942030 | 57272758 | 8.37G | 0.01% | 98.92 | 96.63 | 40.42 |
| T_NKZ_259_2 | 66063796 | 65387320 | 9.51G | 0.01% | 98.98 | 96.82 | 40.9 |
| T_NKZ_259_3 | 67753172 | 66890192 | 9.74G | 0.01% | 98.96 | 96.77 | 40.9 |
| T_D1_1 | 60267546 | 59715630 | 8.73G | 0.01% | 99.04 | 96.96 | 41.59 |
| T_D1_2 | 71734304 | 70984516 | 10.35G | 0.01% | 98.98 | 96.77 | 41.29 |
| T_D1_3 | 63776718 | 63036418 | 9.18G | 0.01% | 98.93 | 96.62 | 41.52 |
| T_D2_1 | 56249872 | 55660728 | 8.11G | 0.01% | 99.01 | 96.88 | 41.28 |
| T_D2_2 | 57390556 | 56809632 | 8.31G | 0.01% | 98.97 | 96.8 | 41.58 |
| T_D2_3 | 68219240 | 67422362 | 9.81G | 0.01% | 99.02 | 96.93 | 41.37 |
| Cucumber | C_CK_1 | 43876890 | 43441906 | 6.33G | 0.01 | 98.87 | 96.52 | 41.40 |
| C_CK_2 | 41297128 | 40941416 | 5.99G | 0.01 | 98.97 | 96.73 | 42.24 |
| C_CK_3 | 44883432 | 4420436 | 6.49G | 0.01 | 98.83 | 96.37 | 42.12 |
| C_EA_1 | 46791100 | 46422784 | 6.78G | 0.01 | 98.99 | 96.82 | 42.25 |
| C_EA_2 | 41572188 | 41226392 | 6.04G | 0.01 | 98.93 | 96.60 | 42.88 |
| C_EA_3 | 44405086 | 43955156 | 6.42G | 0.01 | 98.84 | 96.38 | 41.80 |
| C_CK_N_1 | 42787580 | 42382804 | 6.2G | 0.01 | 98.91 | 96.55 | 42.40 |
| C_CK_N_2 | 46953926 | 46580336 | 6.83G | 0.01 | 98.92 | 96.62 | 42.60 |
| C_CK_N_3 | 40876092 | 40537080 | 5.92G | 0.01 | 98.94 | 96.66 | 43.31 |
| C_NKZ_259_1 | 45140468 | 44672476 | 6.5G | 0.01 | 98.82 | 96.33 | 41.78 |
| C_NKZ_259_2 | 39329542 | 38941780 | 5.69G | 0.01 | 98.90 | 96.55 | 41.75 |
| C_NKZ_259_3 | 46145418 | 45493086 | 6.53G | 0.01 | 98.92 | 96.73 | 40.68 |
| C_D1_1 | 45138418 | 44789596 | 6.54G | 0.01 | 98.96 | 96.73 | 42.57 |
| C_D1_2 | 40020184 | 39673732 | 5.78G | 0.01 | 99.00 | 96.80 | 43.33 |
| C_D1_3 | 43668666 | 43212482 | 6.29G | 0.01 | 98.86 | 96.46 | 41.84 |

**Table S3. Illumina sequencing and transcriptome assembly**

**Table S4. Reads alignment results with reference**

| Plant | Sample name | Total reads | Total mapped | Multiple mapped | Uniquely mapped | Reads  map to '+' | Reads map to '-' | Non-splice reads | Splice reads |
| --- | --- | --- | --- | --- | --- | --- | --- | --- | --- |
| Tomato | T_CK_1 | 75617298 | 70652522 | 1207081 | 69445441 | 34707679 | 34737762 | 46611327 | 22834114 |
| T_CK_2 | 66423002 | 55898802 | 839461 | 55059341 | 27533405 | 27525936 | 40454767 | 14604574 |
| T_CK_3 | 77566352 | 73297228 | 1334667 | 71962561 | 35978427 | 35984134 | 52700729 | 19261832 |
| T_EA_1 | 60595806 | 49217921 | 898319 | 48319602 | 24155995 | 24163607 | 32260646 | 16058956 |
| T_EA_2 | 52936308 | 49753460 | 850062 | 48903398 | 24448445 | 24454953 | 32892440 | 16010958 |
| T_EA_3 | 61285514 | 30749703 | 448111 | 30301592 | 15148238 | 15153354 | 20228106 | 10073486 |
| T_CK_N_1 | 65838070 | 46673384 | 769768 | 45903616 | 22944745 | 22958871 | 28710346 | 17193270 |
| T_CK_N_2 | 58782212 | 54084374 | 870220 | 53214154 | 26601126 | 26613028 | 34304382 | 18909772 |
| T_CK_N_3 | 43199442 | 38881843 | 609483 | 38272360 | 19131826 | 19140534 | 24553042 | 13719318 |
| T_NKZ_259_1 | 57272758 | 39348081 | 698448 | 38649633 | 19322589 | 19327044 | 26123263 | 12526370 |
| T_NKZ_259_2 | 65387320 | 49926739 | 817152 | 49109587 | 24555795 | 24553792 | 33101715 | 16007872 |
| T_NKZ_259_3 | 66890192 | 52700980 | 1019691 | 51681289 | 25838835 | 25842454 | 34480147 | 17201142 |
| T_D1_1 | 59715630 | 52903207 | 818558 | 52084649 | 26039811 | 26044838 | 34405604 | 17679045 |
| T_D1_2 | 70984516 | 63159627 | 1056218 | 62103409 | 31053456 | 31049953 | 42400409 | 19703000 |
| T_D1_3 | 63036418 | 52622134 | 887754 | 51734380 | 25866102 | 25868278 | 34047171 | 17687209 |
| T_D2_1 | 55660728 | 51579452 | 796456 | 50782996 | 25393769 | 25389227 | 35243278 | 15539718 |
| T_D2_2 | 56809632 | 52903459 | 1027148 | 51876311 | 25941529 | 25934782 | 35588234 | 16288077 |
| T_D2_3 | 67422362 | 61555921 | 1052574 | 60503347 | 30253558 | 30249789 | 41267557 | 19235790 |
| Cucumber | C_CK_1 | 43441906 | 42267213 | 706883 | 41560330 | 20779049 | 20781281 | 29737431 | 11822899 |
| C_CK_2 | 40941416 | 39882265 | 703742 | 39178523 | 19590918 | 19587605 | 26469793 | 12708730 |
| C_CK_3 | 44420436 | 42922291 | 772029 | 42150262 | 21075424 | 21074838 | 29274188 | 12876074 |
| C_EA_1 | 46422784 | 45342284 | 876001 | 44466283 | 22235963 | 22230320 | 30289601 | 141766 |
| C_EA_2 | 41226392 | 40098864 | 726281 | 39372583 | 19683289 | 19689294 | 26504284 | 12868299 |
| C_EA_3 | 43955156 | 42679689 | 798642 | 41881047 | 20937847 | 20943200 | 29238277 | 12642770 |
| C_CK_N_1 | 42382804 | 41352201 | 849801 | 40502400 | 20251108 | 20251292 | 26786881 | 13715519 |
| C_CK_N_2 | 46580336 | 45428961 | 866968 | 44561993 | 22271829 | 22290164 | 29889333 | 14672660 |
| C_CK_N_3 | 40537080 | 39463300 | 1191432 | 38271868 | 19130797 | 19141071 | 23424653 | 14847215 |
| C_NKZ_259_1 | 44672476 | 43483819 | 844152 | 42639667 | 21316488 | 21323179 | 29377546 | 13262121 |
| C_NKZ_259_2 | 38941780 | 37905957 | 768186 | 37137771 | 18565296 | 18572475 | 25797041 | 11340730 |
| C_NKZ_259_3 | 45493086 | 43945262 | 679396 | 43265866 | 21631556 | 21634310 | 32546839 | 10719027 |
| C_D1_1 | 44789596 | 43319244 | 891860 | 42427384 | 21202500 | 21224884 | 28538784 | 13888600 |
| C_D1_2 | 39673732 | 38768667 | 842704 | 37925963 | 18955813 | 18970150 | 24793742 | 13132221 |
| C_D1_3 | 43212482 | 40055247 | 785132 | 39270115 | 19631324 | 19638791 | 27497049 | 11773066 |

**Table S5 List of qRT-CPR primers for DEG**

| Plant | Gene number | Forward primer (5’ - 3’) | Reverse primer (5’ - 3’) |
| --- | --- | --- | --- |
| Tomato | Solyc06g060340.3 | CAGTGAAGGAGGTCCATTGT | ATCTCATTGATTGGGACACC |
| Solyc11g005340.2 | GTGGAGAGTTAAGGATTGAAGC | AACCTTGTGGGTTGAAGATG |
| Solyc01g087590.3 | TTGGTGACAACAGAAGATGG | AACCATCACGTCCAAGTTTC |
| Solyc06g035700.1 | GATCGTGCATACTCCTACCC | TTCCTCTTCGTCCACAAACT |
| Solyc03g031860.3 | TGCCTCAAGATGAATTAGCA | CTGAGCTCAATTCTGTCACG |
| Solyc11g042560.1 | TGGTTGGGGAGTTATCAGAA | GAGCTGCCATTTGTACGTCT |
| Solyc12g009200.2 | CAACTAGCCCTAATGGGATG | GTGATCCTCTTCCCCACATA |
| Solyc06g073260.3 | AATGAGAGGAAGCCAGAACA | GGGTTGAATAGCAACCAAAC |
| Solyc03g093180.1 | CATTTGGTGAGTCTGTTGGA | CAGCAATATTAGCAGCCACA |
| Solyc03g080150.3 | GGACTCACCAGCAAATAACC | TCATAGCCAAGTCCTCCAGT |
| Solyc02g081330.3 | GCCCTAATGCATCACACATA | ACAAGTCCATACGCATTCCT |
| Solyc04g007630.2 | CAAACGTAAACCAATGCAGA | CATCCACTGATTTCACACCTT |
| Solyc12g094720.2 | GATTTGATAGAAGCTGGCAAAG | CAGTCTGTTGTAAATCCCATTG |
| Solyc03g005020.3 | CACCCTTGACGCTAGAGATT | TGAGAATGATGCCAAAGCTA |
| Solyc10g086180.2 | AAGCATCATCCTGGACAAAT | CCACTGTGGTGACGTTCTAA |
| Solyc01g096670.3 | TGGCTATTCCCATTCCTTTA | AAAAGCATCGGAATCTAACG |
| Solyc08g065940.3 | TTGAATCTCCTCCGATGACT | GTCGGAGTTGTTGGCATACT |
| Solyc02g085800.1 | ATCGTCTTCCTGCTGCTTAC | TGGCTACGTGATAAGCAATG |
| Solyc01g005300.3 | GGGTCCTGAACGAATTGTAT | ATGGCAAGGTGTATTCCAGT |
| Solyc09g065800.3 | GTACGCAGCAATGAATACCA | GACGGTTTTGGAGAAATCAG |
| Solyc01g099650.3 | TTGCTCTCGAATCATCAGAA | CAATTTCTCCAACACCTGAAC |
| Solyc10g078770.2 | AGCCAATGTTCAAGAGAAGG | CAGTGGCACCATAACCAGTA |
| Solyc08g005610.3 | AAGATTGATCATGGCGATTT | GCTTGTAGGACACTGGGATT |
| Solyc12g011450.2 | AGCTGTGCTAGGTTTCCAAG | CTTGAGTTCAGCAAATGTGG |
| Solyc03g045070.1 | GGATTCTTCATGGGAAGCTA | CCAACAACAGCATCAACTACA |
| Solyc02g077300.2 | TTATTGATTGGGCATCTCCT | GGGAGAAGAAGACATGGTTG |
| Solyc09g083190.3 | AGCCTTATCCACGTATAGCC | ACTGAATTGGGAACTGGAAT |
| Solyc02g080530.3 | CTGGACTCAACAAGGAGGAT | GCCCTCCTAGAGCAACAATA |
| Solyc08g079750.3 | CCTTTGTATTCTCCGTCCAC | TGAAATGGTTGTTGTTCTGG |
| Solyc07g066310.3 | CAAAGTTGTGGCTAGTGGTG | TGGGACTGTATCCATCAACA |

| Plant | Gene number | Forward primer (5’ - 3’) | Reverse primer (5’ - 3’) |
| --- | --- | --- | --- |
| Tomato | Solyc08g005680.3 | CTCTGACAGTGTCTGCTCGT | GCCCATCTCCTATTACCATC |
| Solyc04g078900.3 | GCTTCTTGAGTGTGTCAAGG | CACATCAGCTACAGCCTCTC |
| Solyc12g098350.1 | TGTTCTCCAACACCAACATC | TGCTGGTAGTACGTCTGGAA |
| Solyc07g015860.3 | ATGAACCGTCTCAGGACATT | TCATTTGTGTCTTCCAGCAC |
| Solyc07g007870.3 | TAGCATATGGGCAAACTGAA | GACGACCATATGACACGAGA |
| Solyc12g015880.2 | GGACCAGCTTGAATACCTTG | CTCCTCTACCTTTCCTTCC |
| Solyc07g061720.3 | TAAAGCCAACTCCAAGAACC | CCATAACCAAAAGGATCAGC |
| Solyc04g016430.3 | ATATCCGCCTCCATGTTTAC | AAGAGTGAGGGCATTGAGTC |
| ENSRNA050029626 | TTTGAGGGGGATGTTGTCT | GAGAGGAATGAAGCCTGGTC |
| *GAPDH* | CAGGAACCCTGAAGATATCCC | GCAGTTGGTACTCTGAAGGCC |
| Cucumber | CsaV4_1G002969 | TGCGAGTACATGCCCAAAGT | ACAGAAGGACAAGCAGCCTC |
| CsaV4_1G003004 | GGTCCAAACTGGAGCAACTC | ACGGAGAGGCCGTATTTTCT |
| CsaV4_6G000607 | AGTCCGGAACAAACACTTGG | GGTGAAGGTGTCGCCTATGT |
| CsaV4_6G003200 | GTTTACCCATGGCTTGCACT | ATCGGCAAGGTCAACAAGTC |
| CsaV4_4G002440 | TTCATGACGCATTGCGGTTG | CAGCGATTGTCGCACAACAT |
| CsaV4_1G001285 | ACATTCTCATCGGCCTCACC | CAGCTGGTCGGACACGTAAT |
| CsaV4_5G001931 | CATCCAAAACGCCTCTTGTT | TGACTTCAGGAGGAGGAGGA |
| CsaV4_4G001894 | TGGTGCCAGACTCATTCGAC | GGACAAGCCTTTTCGACTGC |
| CsaV4_3G004569 | TCGTTGGTGTTGCAGCTAGT | GTGGTCAGTGTAGCGTAGCA |
| CsaV4_6G001683 | TGAGCACCTCTTTCGCTCAA | CCAATACGGGCTTCCTTGGT |
| CsaV4_4G001896 | TCAACACCTGGAGCTGACAC | ACATCGTGGCCTTCTGATCC |
| CsaV4_2G003103 | AGCTGAAGGCGAAACGAGAA | GAAGGCCAAAGTTGTGAGGC |
| CsaV4_4G001893 | TCTCCACTCCAGGAGCTTCA | CCGGTGGTTCCAGTCTTAGG |
| CsaV4_2G001340 | CAAGCTGCCCTAAGAGGAGA | GTAGGCGCCATTGTTGGACT |
| CsaV4_1G001327 | GCACTTTCGATACTCCTGAAGAA | AGGAGGAGGAGGATGAACAAG |
| CsaV4_3G001270 | TTCACCTCCTCATCCTCCTAAC | AGGTCTTCCAAAACCCTACCAT |
| CsaV4_5G002021 | GGTGCAGGAGTTAGGGCATT | CGCACTCTTTCCACTCCACT |
| CsaV4_5G003409 | TTCGACCCATTGGGGTTAGC | CCAAATTCTCCACTGGCCCT |
| CsaV4_5G001728 | TACGGCACCAGCATAAGAAG | TTGGTGACGATGATTCGTTT |
| CsaV4_2G003571 | GAAGATGAATGCAGAAGTGGTTC | AGTCCAAAACCTTGAGCTTTACC |
| CsaV4_3G002717 | AAGCACCATCAACCTTGCCT | CTCTGCGGACCAACTACCAA |
| *Actin* | GCCTGCTATGTATGTTGCCATC | CAAGAGCAACATATGCCAGCT |

Table S6. Linear Regression Equation for Plant Hormones

| Name | Regression equation | Correlation coefficient |
| --- | --- | --- |
| OxIAA | y=162722404.3702x+51237.1099 | R²=0.9957 |
| IBA | y=378322257.5029x+276397.0756 | R²=0.9939 |
| ABA | y=16337926.8533x+6878.1274 | R²=0.9986 |
| *c*ZR | y=870016047.7832x+130770.2913 | R²=0.9938 |
| GA1 | y=1384814.8040x +117133.6229 | R²=0.9904 |
| GA7 | y =234203494.5733x +24415.1092 | R²=0.9964 |
| IAA-Ala | y=272659137.0070x +11841.4228 | R²=0.9919 |
| IAA-Asp | y=89309486.5253x+37514.6179 | R²=0.9955 |
| IAA-Glu | y=354609440.7099x+8293.1286 | R²=0.9972 |
| ICA | y=386166963.8513x+314305.6435 | R²=0.9901 |
| IPR | y=1127949038.1816x+81982.0253 | R²=0.9960 |
| JA | y=45396003.3516x+12447.3998 | R²=0.9981 |
| KR | y=4133361952.2084x+50605.6318 | R²=0.9906 |
| MT | y=3422303145.5804x+682729.3091 | R²=0.9900 |
| *m*TR | y=595104059.1408x+612774.5554 | R²=0.9910 |
| MeIAA | y=2056974424.1866x+129311.7909 | R²=0.9979 |
| MESA | y=372748431.9575x+215040.9684 | R²=0.9993 |
| IP | y=784775861.0272x+56692.2378 | R²=0.9937 |
| JA-ILE | y=23832870.3718x+2327.3608 | R²=0.9980 |
| SA | y=82275644.9434x+64616.6436 | R²=0.9992 |
| *t*Z | y=276868752.3415x+240324.7547 | R²=0.9908 |
| *t*ZR | y=319181886.8764x+62207.1232 | R²=0.9924 |
| TRA | y=151867623.0410x+177515.1836 | R²=0.9951 |
| TRP | y=112672539.2105x+745644.0034 | R²=0.9994 |

Note: Y represents the peak area (μV·S); X represents the concentration (mg/L).

**Table S7. Transcribed data validated by qRT-PCR of tomato after irrigation treatment with DHPQCA**

| Gene_id | Relative expression (R/S) | |
| --- | --- | --- |
| RNA-seq | qRT-PCR |
| Solyc02g066920.3 | 5.23 | 3.78 |
| Solyc07g007280.3 | 5.12 | 2.17 |
| Solyc06g060340.3 | 4.79 | 5.87 |
| Solyc11g005340.2 | 4.73 | 3.25 |
| Solyc01g087590.3 | 4.41 | 3.81 |
| Solyc06g035700.1 | 4.31 | 3.19 |
| Solyc03g031860.3 | 4.16 | 5.34 |
| Solyc11g042560.1 | 4.16 | 3.69 |
| Solyc12g009200.2 | 4.06 | 4.86 |
| Solyc06g073260.3 | 3.73 | 3.75 |
| Solyc03g093180.1 | 3.62 | 4.69 |
| Solyc03g080150.3 | 3.55 | 3.12 |
| Solyc02g081330.3 | 3.17 | 2.74 |
| Solyc04g007630.2 | 3.04 | 3.79 |
| Solyc12g094720.2 | 3.02 | 3.99 |
| Solyc03g005020.3 | -3.01 | -4.11 |
| Solyc10g086180.2 | -3.11 | -3.36 |
| Solyc01g096670.3 | -3.78 | -2.72 |
| Solyc08g065940.3 | -3.82 | -3.19 |
| Solyc02g085800.1 | -4.60 | -3.27 |
| ENSRNA050029626 | -5.22 | -2.34 |
| Solyc09g065800.3 | -5.50 | -2.81 |
| Solyc01g099650.3 | -6.80 | -3.54 |

**Table S8. Transcribed data validated by qRT-PCR of tomato after irrigation treatment with MeDHPQCA**

| Gene_id | Relative expression (R/S) | |
| --- | --- | --- |
| RNA-seq | qRT-PCR |
| Solyc06g060340.3 | 4.42 | 2.99 |
| Solyc11g005340.2 | 5.37 | 2.64 |
| Solyc06g035700.1 | 3.77 | 1.90 |
| Solyc11g042560.1 | 4.07 | 2.96 |
| Solyc03g093180.1 | 3.85 | 3.19 |
| Solyc10g078770.2 | 5.34 | 3.58 |
| Solyc12g011450.2 | 5.03 | 1.78 |
| Solyc08g005610.3 | 4.91 | 1.67 |
| Solyc03g045070.1 | 3.97 | 3.10 |
| Solyc02g077300.2 | 3.81 | 1.64 |
| Solyc09g083190.3 | 3.45 | 3.73 |
| Solyc02g080530.3 | 3.35 | 1.72 |
| Solyc08g079750.3 | 3.21 | 1.90 |
| Solyc07g066310.3 | 2.61 | 1.20 |
| Solyc08g005680.3 | 2.05 | 2.02 |
| Solyc04g078900.3 | 1.56 | 2.05 |
| Solyc12g098350.1 | 1.48 | 1.33 |
| Solyc07g015860.3 | 1.46 | 1.31 |
| Solyc07g007870.3 | -2.29 | -1.38 |
| Solyc12g015880.2 | -3.14 | -2.41 |
| Solyc07g061720.3 | -3.17 | -3.71 |
| Solyc04g016430.3 | -4.58 | -1.72 |
| Solyc01g005300.3 | -5.63 | -7.07 |

**Table S9. Transcribed data validated by qRT-PCR of cucumber after irrigation treatment with DHPQCA**

| Gene_id | Relative expression (R/S) | |
| --- | --- | --- |
| RNA-seq | qRT-PCR |
| CsaV4_1G002969 | 9.16 | 3.30 |
| CsaV4_1G003004 | 5.04 | 2.27 |
| CsaV4_6G000607 | 3.31 | 1.09 |
| CsaV4_6G003200 | 5.95 | 4.44 |
| CsaV4_4G002440 | 5.70 | 9.83 |
| CsaV4_1G001285 | 10.90 | 5.18 |
| CsaV4_5G001931 | 9.23 | 2.79 |
| CsaV4_4G001894 | 7.25 | 2.05 |
| CsaV4_3G004569 | 7.05 | 1.53 |
| CsaV4_6G001683 | 6.76 | 2.53 |
| CsaV4_2G003103 | 6.59 | 4.61 |
| CsaV4_4G001896 | 6.35 | 2.18 |
| CsaV4_4G001893 | 5.51 | 0.95 |
| CsaV4_2G001340 | 5.38 | 4.64 |
| CsaV4_1G001327 | 5.33 | 6.54 |
| CsaV4_3G001270 | 5.32 | 1.73 |
| CsaV4_5G002021 | -5.41 | -1.61 |
| CsaV4_5G003409 | -5.43 | -2.23 |
| CsaV4_5G001728 | -6.02 | -2.71 |
| CsaV4_2G003571 | -6.21 | -0.16 |
| CsaV4_3G002717 | -7.77 | -2.52 |
